# Supplementary material
Source: publisher site journal article supplement (https://www.dovepress.com/article/356543)
Supplement: Supplementary file 1 [file get_supplementary_file.php]

**Table S1** Hardy-Weinberg equilibrium

| Gene | Variant | Allele | Percentage | Genotype | N (%) | P.value |
| --- | --- | --- | --- | --- | --- | --- |
| CYP3A4*1B | rs2740574 | T C | 100 0 | TT TC | 295(100) 0 | 1 |
| CYP3A4*22 | rs35599367 | G A | 99.3 0.007 | GG GA | 293(99.3) 2(0.007) | 0.412 |
| CYP3A5*3 | rs776746 | C T | 69.5 30.5 | CC TC TT | 137(46.4) 136(46.0) 22(7.6) | 0.496 |
| ABCB1 | rs1128503 (1236C>T) | T C | 64.2  35.8 | TT TC CC | 124(42.0) 131(44.4) 40(13.6) | 0.938 |
| ABCB1 | rs2032582 (2677G>A) | G A | 47.6  52.4 | GG GA AA | 68(23.1) 145(49.2) 82(27.7) | 0.986 |
| ABCB1 | rs1045642 (3435C>T) | C T | 62.4  37.6 | TT TC CC | 41(13.9) 140(47.5)  114(38.6) | 0.958 |
| ABCC2 | rs717620 | T C | 22.5  77.5 | TT TC CC | 18(6.1) 97(32.9) 180(61.0) | 0.787 |
| ABCC2 | rs2273697 | G A | 90.5 9.5 | GG GA AA | 241(81.7) 52(17.6) 2(0.7) | 0.886 |
| ABCC2 | rs3740066 | C T | 76.3 23.7 | TT TC CC | 14(4.7) 112(38.0) 169(57.3) | 0.786 |
| POR28 | rs2868177 | C T | 38.3 61.7 | TT TC CC | 111(37.6) 142(48.1) 42(14.2) | 0.985 |
| PXR | rs6785049 | G A | 60.0 40.0 | GG GA AA | 97(32.9) 160(54.2) 38(12.9) | 0.297 |

Abbreviations: CYP3A4, Cytochrome P450 family 3 subfamily A member 4; CYP3A5, Cytochrome P450 family 3 subfamily A member 5; ABCB1, ATP binding cassette subfamily B member 1; ABCC2, ATP binding cassette subfamily C member 2; POR, P450 oxidoreductase; PXR, pregnane X receptor; N: number
